# Supplementary material for: Influence of Oxygen Minimum Zone on Macrobenthic Community Structure in the Northern Benguela Upwelling System: A Macro-Nematode Perspective
Source: Copernicus journal article supplement (doi:10.5194/bg-2023-151), 2023-10-06
Supplement: Supplementary file 1 [file bg-2023-151-supplement.pdf]

*Table S1a:* Summary of Stepwise regression analysis results of abiotic factors with a significant influence on macrobenthic diversity indices

| <b>Stepwise regression result summary</b> |                                                    |
|-------------------------------------------|----------------------------------------------------|
| <b>Diversity Index</b>                    | <b>Predictors (feedback)</b>                       |
| H' diversity                              | None (No variables were entered into the equation) |
| Richness                                  | DO                                                 |
| Dominance                                 | None (No variables were entered into the equation) |
| oneminusD                                 | None (No variables were entered into the equation) |
| evenness                                  | None (No variables were entered into the equation) |
| margalef                                  | TOM                                                |
| Berger_Parker                             | None (No variables were entered into the equation) |
| Equitability_J                            | None (No variables were entered into the equation) |
| Fisher_alpha                              | None (No variables were entered into the equation) |
| Brillouin                                 | None (No variables were entered into the equation) |
| Menhinick                                 | Very Coarse Sand                                   |

*Table S1b(1):* Model Summary for Stepwise regression analysis of abiotic predictors of species richness in the Benguela upwelling system.

| Model | R                 | R Square | Adjusted R Square | Std. Error of the Estimate |
|-------|-------------------|----------|-------------------|----------------------------|
| 1     | .722 <sup>a</sup> | .521     | .467              | 1.92590                    |

a. Predictors: (Constant), DO

*Table S1b(2):* ANOVA results for stepwise regression analysis of the predictor of macrobenthic species richness in the Benguela Upwelling system.

| Model        | Sum of Squares | df | Mean Square | F     | Sig.              |
|--------------|----------------|----|-------------|-------|-------------------|
| 1 Regression | 36.254         | 1  | 36.254      | 9.774 | .012 <sup>b</sup> |
| Residual     | 33.382         | 9  | 3.709       |       |                   |
| Total        | 69.636         | 10 |             |       |                   |

a. Dependent Variable: Richness

b. Predictors: (Constant), DO

*Table S1c(1): Model Summary for Stepwise regression analysis of abiotic predictors of Margalef Index in the Benguela upwelling system.*

| Model | R                 | R Square | Adjusted R Square | Std. Error of the Estimate |
|-------|-------------------|----------|-------------------|----------------------------|
| 1     | .610 <sup>a</sup> | .372     | .302              | .7403625                   |

a. Predictors: (Constant), TOM

*Table S1c(2): ANOVA results for stepwise regression analysis of the predictor of Margalef Index richness in the Benguela Upwelling system*

| Model        | Sum of Squares | df | Mean Square | F     | Sig.              |
|--------------|----------------|----|-------------|-------|-------------------|
| 1 Regression | 2.919          | 1  | 2.919       | 5.324 | .046 <sup>b</sup> |
| Residual     | 4.933          | 9  | .548        |       |                   |
| Total        | 7.852          | 10 |             |       |                   |

a. Dependent Variable: margalef

b. Predictors: (Constant), TOM

*Table S1d(1): Model Summary for Stepwise regression analysis of abiotic predictors of Menhinick in the Benguela upwelling system.*

| Model | R                 | R Square | Adjusted R Square | Std. Error of the Estimate |
|-------|-------------------|----------|-------------------|----------------------------|
| 1     | .627 <sup>a</sup> | .393     | .325              | .52573                     |

a. Predictors: (Constant), V\_Coarse\_Sand

*Table S1d(2): ANOVA results for stepwise regression analysis of the predictor of Menhinick in the Benguela Upwelling system*

| Model        | Sum of Squares | df | Mean Square | F     | Sig.              |
|--------------|----------------|----|-------------|-------|-------------------|
| 1 Regression | 1.610          | 1  | 1.610       | 5.825 | .039 <sup>b</sup> |
| Residual     | 2.488          | 9  | .276        |       |                   |
| Total        | 4.098          | 10 |             |       |                   |

a. Dependent Variable: Menhinick

b. Predictors: (Constant), V\_Coarse\_Sand
